# Supplementary material
Source: MDPI journal article supplement (https://www.mdpi.com/2073-4433/15/1/29)
Supplement: s1 [file s1]

# Supplementary Materials: Is the Invasive Plant *Amaranthus spinosus* L. More Competitive than the Native Plant *A. tricolor* L. When Exposed to Acid Deposition with Different Sulfur–Ni–trogen Ratios?

Yue Li <sup>1</sup>, Chuang Li <sup>1</sup>, Shanshan Zhong <sup>1</sup>, Zhelun Xu <sup>1</sup>, Jun Liu <sup>2</sup>, Zhongyi Xu <sup>1</sup>, Mawei Zhu <sup>1</sup>, Congyan Wang <sup>1,3,4,\*</sup> and Daolin Du <sup>5,\*</sup>

## Electronic supplementary materials:

**Table S1.** Four-way ANOVA on the effects of planting pattern, plant species, acid deposition acidity, acid deposition type, and their interactions on the evaluated variances.  $P \leq 0.05$  is presented in bold.

|                  |                                     | Mean Square  | F         | P                 | $\eta^2$ |
|------------------|-------------------------------------|--------------|-----------|-------------------|----------|
| Planting pattern | Plant height                        | 0.3521       | 0.0712    | 0.7906            | 0.0013   |
|                  | Ground diameter                     | 0.4187       | 0.6874    | 0.4106            | 0.0121   |
|                  | Leaf length                         | 0.1182       | 0.1076    | 0.7441            | 0.0019   |
|                  | Leaf width                          | 2.0410       | 2.0814    | 0.1547            | 0.0358   |
|                  | Green leaf area                     | 129.1692     | 0.4196    | 0.5198            | 0.0074   |
|                  | Leaf thickness                      | 0.0008       | 0.3252    | 0.5708            | 0.0058   |
|                  | Single-leaf wet weight              | 0.2632       | 4.8596    | <b>0.0316</b>     | 0.0798   |
|                  | Single-leaf dry weight              | 0.0018       | 5.2486    | <b>0.0257</b>     | 0.0857   |
|                  | Leaf water content                  | 0.0426       | 0.2050    | 0.6525            | 0.0036   |
|                  | Specific leaf area                  | 31109.9047   | 4.3019    | <b>0.0427</b>     | 0.0713   |
|                  | Leaf chlorophyll content            | 88.4552      | 125.0276  | <b>&lt;0.0001</b> | 0.6907   |
|                  | Leaf nitrogen content               | 0.3143       | 28.1810   | <b>&lt;0.0001</b> | 0.3348   |
|                  | Plant aboveground wet weight        | 13.4670      | 1.0716    | 0.3050            | 0.0188   |
|                  | Plant aboveground dry weight        | 0.0113       | 0.1679    | 0.6836            | 0.0030   |
|                  | Plant aboveground water content     | 0.2289       | 0.6947    | 0.4081            | 0.0123   |
|                  | Plant malondialdehyde content       | 0.0000       | 0.1571    | 0.6933            | 0.0028   |
|                  | Plant proline content               | 1321.4778    | 3.3929    | 0.0708            | 0.0571   |
|                  | Plant soluble sugar content         | 0.2133       | 0.9518    | 0.3335            | 0.0167   |
|                  | Plant catalase activity             | 12.5671      | 2.1429    | 0.1488            | 0.0369   |
|                  | Plant peroxidase activity           | 0.2490       | 0.0214    | 0.8842            | 0.0004   |
|                  | Plant superoxide dismutase activity | 6865.8836    | 5.1353    | <b>0.0273</b>     | 0.0840   |
| Plant species    | Plant height                        | 2535.5213    | 512.4477  | <b>&lt;0.0001</b> | 0.9015   |
|                  | Ground diameter                     | 1.5920       | 2.6135    | 0.1116            | 0.0446   |
|                  | Leaf length                         | 113.1021     | 102.9752  | <b>&lt;0.0001</b> | 0.6477   |
|                  | Leaf width                          | 331.8350     | 338.4062  | <b>&lt;0.0001</b> | 0.8580   |
|                  | Green leaf area                     | 82985.4758   | 269.5912  | <b>&lt;0.0001</b> | 0.8280   |
|                  | Leaf thickness                      | 0.0986       | 42.7523   | <b>&lt;0.0001</b> | 0.4329   |
|                  | Single-leaf wet weight              | 8.2268       | 151.8928  | <b>&lt;0.0001</b> | 0.7306   |
|                  | Single-leaf dry weight              | 0.0026       | 7.4836    | <b>0.0083</b>     | 0.1179   |
|                  | Leaf water content                  | 249.8699     | 1203.2671 | <b>&lt;0.0001</b> | 0.9555   |
|                  | Specific leaf area                  | 4726713.2955 | 653.6083  | <b>&lt;0.0001</b> | 0.9211   |
|                  | Leaf chlorophyll content            | 3895.8297    | 5506.5889 | <b>&lt;0.0001</b> | 0.9899   |
|                  | Leaf nitrogen content               | 18.5719      | 1665.0280 | <b>&lt;0.0001</b> | 0.9675   |
|                  | Plant aboveground wet weight        | 163.3333     | 12.9970   | <b>0.0007</b>     | 0.1884   |
|                  | Plant aboveground dry weight        | 0.2581       | 3.8232    | 0.0555            | 0.0639   |
|                  | Plant aboveground water content     | 60.4264      | 183.3595  | <b>&lt;0.0001</b> | 0.7660   |
|                  | Plant malondialdehyde content       | 0.0002       | 33.0571   | <b>&lt;0.0001</b> | 0.3712   |
|                  | Plant proline content               | 1032.7440    | 2.6516    | 0.1091            | 0.0452   |
|                  | Plant soluble sugar content         | 6.2784       | 28.0223   | <b>&lt;0.0001</b> | 0.3335   |
|                  | Plant catalase activity             | 551.6949     | 94.0753   | <b>&lt;0.0001</b> | 0.6269   |

|                                   |                                     |             |          |                   |        |
|-----------------------------------|-------------------------------------|-------------|----------|-------------------|--------|
| Acid deposition acidity           | Plant peroxidase activity           | 109.4748    | 9.4047   | <b>0.0033</b>     | 0.1438 |
|                                   | Plant superoxide dismutase activity | 650.9429    | 0.4869   | 0.4882            | 0.0086 |
|                                   | Plant height                        | 56.2978     | 11.3782  | <b>0.0014</b>     | 0.1689 |
|                                   | Ground diameter                     | 0.0394      | 0.0647   | 0.8001            | 0.0012 |
|                                   | Leaf length                         | 8.2463      | 7.5080   | <b>0.0082</b>     | 0.1182 |
|                                   | Leaf width                          | 3.3440      | 3.4102   | 0.0701            | 0.0574 |
|                                   | Green leaf area                     | 1643.6611   | 5.3397   | <b>0.0246</b>     | 0.0871 |
|                                   | Leaf thickness                      | 0.0001      | 0.0602   | 0.8071            | 0.0011 |
|                                   | Single-leaf wet weight              | 0.3444      | 6.3596   | <b>0.0145</b>     | 0.1020 |
|                                   | Single-leaf dry weight              | 0.0014      | 4.1220   | <b>0.0471</b>     | 0.0686 |
|                                   | Leaf water content                  | 0.6498      | 3.1292   | 0.0823            | 0.0529 |
|                                   | Specific leaf area                  | 2519.5378   | 0.3484   | 0.5574            | 0.0062 |
|                                   | Leaf chlorophyll content            | 28.0134     | 39.5957  | <b>&lt;0.0001</b> | 0.4142 |
|                                   | Leaf nitrogen content               | 0.1613      | 14.4650  | <b>0.0004</b>     | 0.2053 |
|                                   | Plant aboveground wet weight        | 33.6200     | 2.6753   | 0.1075            | 0.0456 |
|                                   | Plant aboveground dry weight        | 0.1600      | 2.3698   | 0.1293            | 0.0406 |
|                                   | Plant aboveground water content     | 0.0618      | 0.1875   | 0.6667            | 0.0033 |
|                                   | Plant malondialdehyde content       | 0.0000      | 3.6269   | 0.0620            | 0.0608 |
|                                   | Plant proline content               | 12511.6294  | 32.1240  | <b>&lt;0.0001</b> | 0.3645 |
|                                   | Plant soluble sugar content         | 0.1760      | 0.7856   | 0.3792            | 0.0138 |
|                                   | Plant catalase activity             | 0.3090      | 0.0527   | 0.8193            | 0.0009 |
|                                   | Plant peroxidase activity           | 5.0315      | 0.4322   | 0.5136            | 0.0077 |
|                                   | Plant superoxide dismutase activity | 354.7937    | 0.2654   | 0.6085            | 0.0047 |
|                                   | Plant height                        | 291.1244    | 58.8384  | <b>&lt;0.0001</b> | 0.6776 |
|                                   | Ground diameter                     | 4.8021      | 7.8834   | <b>0.0010</b>     | 0.2197 |
|                                   | Leaf length                         | 5.3543      | 4.8749   | <b>0.0112</b>     | 0.1483 |
|                                   | Leaf width                          | 0.7119      | 0.7260   | 0.4883            | 0.0253 |
|                                   | Green leaf area                     | 487.9416    | 1.5852   | 0.2140            | 0.0536 |
|                                   | Leaf thickness                      | 0.0052      | 2.2478   | 0.1151            | 0.0743 |
|                                   | Single-leaf wet weight              | 0.2490      | 4.5974   | <b>0.0142</b>     | 0.1410 |
|                                   | Single-leaf dry weight              | 0.0028      | 8.0544   | <b>0.0008</b>     | 0.2234 |
|                                   | Leaf water content                  | 0.8015      | 3.8597   | <b>0.0269</b>     | 0.1211 |
|                                   | Specific leaf area                  | 45876.9380  | 6.3438   | <b>0.0033</b>     | 0.1847 |
| Acid deposition type              | Plant chlorophyll content           | 20.0649     | 28.3609  | <b>&lt;0.0001</b> | 0.5032 |
|                                   | Leaf nitrogen content               | 0.1857      | 16.6466  | <b>&lt;0.0001</b> | 0.3729 |
|                                   | Plant aboveground wet weight        | 146.4676    | 11.6549  | <b>0.0001</b>     | 0.2939 |
|                                   | Plant aboveground dry weight        | 0.7588      | 11.2412  | <b>0.0001</b>     | 0.2865 |
|                                   | Plant aboveground water content     | 0.1513      | 0.4591   | 0.6342            | 0.0161 |
|                                   | Plant malondialdehyde content       | 0.0000      | 4.6997   | <b>0.0130</b>     | 0.1437 |
|                                   | Plant proline content               | 197609.7657 | 507.3700 | <b>&lt;0.0001</b> | 0.9477 |
|                                   | Plant soluble sugar content         | 3.4151      | 15.2428  | <b>&lt;0.0001</b> | 0.3525 |
|                                   | Plant catalase activity             | 16.3403     | 2.7864   | 0.0702            | 0.0905 |
|                                   | Plant peroxidase activity           | 184.6892    | 15.8662  | <b>&lt;0.0001</b> | 0.3617 |
|                                   | Plant superoxide dismutase activity | 287.8707    | 0.2153   | 0.8070            | 0.0076 |
|                                   | Plant height                        | 24.4803     | 4.9477   | <b>0.0302</b>     | 0.0812 |
|                                   | Ground diameter                     | 0.3818      | 0.6267   | 0.4319            | 0.0111 |
|                                   | Leaf length                         | 12.7401     | 11.5994  | <b>0.0012</b>     | 0.1716 |
|                                   | Leaf width                          | 0.0473      | 0.0483   | 0.8269            | 0.0009 |
| Planting pattern<br>Plant species | Green leaf area                     | 244.3660    | 0.7939   | 0.3767            | 0.0140 |
|                                   | Leaf thickness                      | 0.0022      | 0.9619   | 0.3309            | 0.0169 |
|                                   | Single-leaf wet weight              | 0.1904      | 3.5154   | 0.0660            | 0.0591 |
|                                   | Single-leaf dry weight              | 0.0014      | 4.0011   | 0.0503            | 0.0667 |
|                                   | Leaf water content                  | 0.4967      | 2.3917   | 0.1276            | 0.0410 |
|                                   | Specific leaf area                  | 26611.8983  | 3.6799   | 0.0602            | 0.0617 |
|                                   | Leaf chlorophyll content            | 47.3630     | 66.9456  | <b>&lt;0.0001</b> | 0.5445 |
|                                   | Leaf nitrogen content               | 0.1694      | 15.1851  | <b>0.0003</b>     | 0.2133 |
|                                   | Plant aboveground wet weight        | 24.4803     | 1.9480   | 0.1683            | 0.0336 |
|                                   | Plant aboveground dry weight        | 0.0036      | 0.0531   | 0.8186            | 0.0009 |
|                                   | Plant aboveground water content     | 1.6099      | 4.8851   | <b>0.0312</b>     | 0.0802 |
|                                   | Plant malondialdehyde content       | 0.0000      | 0.3043   | 0.5834            | 0.0054 |

|                                             |                                          |                                 |         |                   |        |
|---------------------------------------------|------------------------------------------|---------------------------------|---------|-------------------|--------|
| Planting pattern<br>Acid deposition acidity | Plant proline content                    | 25.3921                         | 0.0652  | 0.7994            | 0.0012 |
|                                             | Plant soluble sugar content              | 0.0354                          | 0.1580  | 0.6925            | 0.0028 |
|                                             | Plant catalase activity                  | 2.4797                          | 0.4228  | 0.5182            | 0.0075 |
|                                             | Plant peroxidase activity                | 3.2286                          | 0.2774  | 0.6005            | 0.0049 |
|                                             | Plant superoxide dismutase activity      | 169.7771                        | 0.1270  | 0.7229            | 0.0023 |
|                                             | Plant height                             | 0.0484                          | 0.0098  | 0.9216            | 0.0002 |
|                                             | Ground diameter                          | 0.4729                          | 0.7763  | 0.3820            | 0.0137 |
|                                             | Leaf length                              | 0.0000                          | 0.0000  | 0.9970            | 0.0000 |
|                                             | Leaf width                               | 0.2094                          | 0.2136  | 0.6458            | 0.0038 |
|                                             | Green leaf area                          | 30.7423                         | 0.0999  | 0.7532            | 0.0018 |
|                                             | Leaf thickness                           | 0.0039                          | 1.6786  | 0.2004            | 0.0291 |
|                                             | Single-leaf wet weight                   | 0.0193                          | 0.3571  | 0.5526            | 0.0063 |
|                                             | Single-leaf dry weight                   | 0.0003                          | 0.9965  | 0.3225            | 0.0175 |
|                                             | Leaf water content                       | 0.0044                          | 0.0210  | 0.8854            | 0.0004 |
|                                             | Specific leaf area                       | 2758.0022                       | 0.3814  | 0.5394            | 0.0068 |
|                                             | Leaf chlorophyll content                 | 8.3183                          | 11.7575 | <b>0.0011</b>     | 0.1735 |
|                                             | Leaf nitrogen content                    | 0.0551                          | 4.9393  | <b>0.0303</b>     | 0.0811 |
|                                             | Plant aboveground wet weight             | 3.2939                          | 0.2621  | 0.6107            | 0.0047 |
|                                             | Plant aboveground dry weight             | 0.0127                          | 0.1876  | 0.6666            | 0.0033 |
|                                             | Planting pattern<br>Acid deposition type | Plant aboveground water content | 0.0003  | 0.0008            | 0.9771 |
| Plant malondialdehyde content               |                                          | 0.0000                          | 0.7036  | 0.4051            | 0.0124 |
| Plant proline content                       |                                          | 21.1000                         | 0.0542  | 0.8168            | 0.0010 |
| Plant soluble sugar content                 |                                          | 0.9655                          | 4.3092  | <b>0.0425</b>     | 0.0715 |
| Plant catalase activity                     |                                          | 1.3250                          | 0.2259  | 0.6364            | 0.0040 |
| Plant peroxidase activity                   |                                          | 0.2335                          | 0.0201  | 0.8879            | 0.0004 |
| Plant superoxide dismutase activity         |                                          | 3102.7437                       | 2.3207  | 0.1333            | 0.0398 |
| Plant height                                |                                          | 8.6591                          | 1.7501  | 0.1831            | 0.0588 |
| Ground diameter                             |                                          | 0.1096                          | 0.1799  | 0.8358            | 0.0064 |
| Leaf length                                 |                                          | 2.8920                          | 2.6330  | 0.0807            | 0.0860 |
| Leaf width                                  |                                          | 0.5615                          | 0.5727  | 0.5673            | 0.0200 |
| Green leaf area                             |                                          | 144.0742                        | 0.4680  | 0.6287            | 0.0164 |
| Leaf thickness                              |                                          | 0.0026                          | 1.1265  | 0.3314            | 0.0387 |
| Single-leaf wet weight                      |                                          | 0.0034                          | 0.0623  | 0.9397            | 0.0022 |
| Single-leaf dry weight                      |                                          | 0.0001                          | 0.3595  | 0.6996            | 0.0127 |
| Leaf water content                          |                                          | 0.0755                          | 0.3635  | 0.6969            | 0.0128 |
| Specific leaf area                          |                                          | 5339.5672                       | 0.7384  | 0.4825            | 0.0257 |
| Leaf chlorophyll content                    |                                          | 16.1004                         | 22.7572 | <b>&lt;0.0001</b> | 0.4484 |
| Leaf nitrogen content                       |                                          | 0.0479                          | 4.2918  | <b>0.0184</b>     | 0.1329 |
| Plant species<br>Acid deposition acidity    |                                          | Plant aboveground wet weight    | 7.7560  | 0.6172            | 0.5431 |
|                                             | Plant aboveground dry weight             | 0.0753                          | 1.1159  | 0.3348            | 0.0383 |
|                                             | Plant aboveground water content          | 0.2780                          | 0.8436  | 0.4356            | 0.0292 |
|                                             | Plant malondialdehyde content            | 0.0000                          | 1.2204  | 0.3028            | 0.0418 |
|                                             | Plant proline content                    | 2.6669                          | 0.0068  | 0.9932            | 0.0002 |
|                                             | Plant soluble sugar content              | 0.0237                          | 0.1056  | 0.9000            | 0.0038 |
|                                             | Plant catalase activity                  | 6.5677                          | 1.1199  | 0.3335            | 0.0385 |
|                                             | Plant peroxidase activity                | 30.3181                         | 2.6046  | 0.0829            | 0.0851 |
|                                             | Plant superoxide dismutase activity      | 1763.7118                       | 1.3192  | 0.2755            | 0.0450 |
|                                             | Plant height                             | 7.2835                          | 1.4720  | 0.2301            | 0.0256 |
|                                             | Ground diameter                          | 0.0449                          | 0.0737  | 0.7870            | 0.0013 |
|                                             | Leaf length                              | 0.0068                          | 0.0062  | 0.9375            | 0.0001 |
|                                             | Leaf width                               | 2.7417                          | 2.7960  | 0.1001            | 0.0476 |
|                                             | Green leaf area                          | 738.4711                        | 2.3990  | 0.1270            | 0.0411 |
|                                             | Leaf thickness                           | 0.0074                          | 3.2264  | 0.0779            | 0.0545 |
|                                             | Single-leaf wet weight                   | 0.0103                          | 0.1897  | 0.6649            | 0.0034 |
|                                             | Single-leaf dry weight                   | 0.0000                          | 0.0928  | 0.7617            | 0.0017 |
|                                             | Leaf water content                       | 0.0013                          | 0.0060  | 0.9384            | 0.0001 |
|                                             | Specific leaf area                       | 4749.4811                       | 0.6568  | 0.4211            | 0.0116 |
|                                             | Leaf chlorophyll content                 | 7.2796                          | 10.2894 | <b>0.0022</b>     | 0.1552 |
| Leaf nitrogen content                       | 0.0352                                   | 3.1545                          | 0.0811  | 0.0533            |        |
| Plant aboveground wet weight                | 31.4689                                  | 2.5041                          | 0.1192  | 0.0428            |        |

|                          |                                     |            |          |         |        |
|--------------------------|-------------------------------------|------------|----------|---------|--------|
|                          | Plant aboveground dry weight        | 0.1753     | 2.5967   | 0.1127  | 0.0443 |
|                          | Plant aboveground water content     | 0.0091     | 0.0278   | 0.8683  | 0.0005 |
|                          | Plant malondialdehyde content       | 0.0000     | 0.9118   | 0.3438  | 0.0160 |
|                          | Plant proline content               | 658.3085   | 1.6902   | 0.1989  | 0.0293 |
|                          | Plant soluble sugar content         | 0.0312     | 0.1393   | 0.7104  | 0.0025 |
|                          | Plant catalase activity             | 12.3891    | 2.1126   | 0.1517  | 0.0364 |
|                          | Plant peroxidase activity           | 0.0047     | 0.0004   | 0.9840  | 0.0000 |
|                          | Plant superoxide dismutase activity | 1118.3384  | 0.8365   | 0.3643  | 0.0147 |
|                          | Plant height                        | 1.5593     | 0.3152   | 0.7310  | 0.0111 |
|                          | Ground diameter                     | 0.4488     | 0.7368   | 0.4832  | 0.0256 |
|                          | Leaf length                         | 0.1919     | 0.1747   | 0.8402  | 0.0062 |
|                          | Leaf width                          | 0.2104     | 0.2145   | 0.8076  | 0.0076 |
|                          | Green leaf area                     | 51.7955    | 0.1683   | 0.8456  | 0.0060 |
|                          | Leaf thickness                      | 0.0067     | 2.9261   | 0.0618  | 0.0946 |
|                          | Single-leaf wet weight              | 0.0438     | 0.8094   | 0.4503  | 0.0281 |
|                          | Single-leaf dry weight              | 0.0001     | 0.2860   | 0.7523  | 0.0101 |
|                          | Leaf water content                  | 0.1949     | 0.9385   | 0.3973  | 0.0324 |
| Plant species            | Specific leaf area                  | 22171.3014 | 3.0658   | 0.0545  | 0.0987 |
| Acid deposition type     | Leaf chlorophyll content            | 18.7248    | 26.4667  | <0.0001 | 0.4859 |
|                          | Leaf nitrogen content               | 0.0747     | 6.6940   | 0.0025  | 0.1929 |
|                          | Plant aboveground wet weight        | 4.8912     | 0.3892   | 0.6794  | 0.0137 |
|                          | Plant aboveground dry weight        | 0.0152     | 0.2257   | 0.7987  | 0.0080 |
|                          | Plant aboveground water content     | 0.0669     | 0.2031   | 0.8168  | 0.0072 |
|                          | Plant malondialdehyde content       | 0.0000     | 3.2221   | 0.0474  | 0.1032 |
|                          | Plant proline content               | 619.0106   | 1.5893   | 0.2131  | 0.0537 |
|                          | Plant soluble sugar content         | 0.4275     | 1.9082   | 0.1579  | 0.0638 |
|                          | Plant catalase activity             | 4.9406     | 0.8425   | 0.4360  | 0.0292 |
|                          | Plant peroxidase activity           | 30.0744    | 2.5836   | 0.0845  | 0.0845 |
|                          | Plant superoxide dismutase activity | 300.5801   | 0.2248   | 0.7994  | 0.0080 |
|                          | Plant height                        | 4.2041     | 0.8497   | 0.4330  | 0.0295 |
|                          | Ground diameter                     | 0.6333     | 1.0396   | 0.3603  | 0.0358 |
|                          | Leaf length                         | 1.1140     | 1.0143   | 0.3692  | 0.0350 |
|                          | Leaf width                          | 2.1547     | 2.1973   | 0.1206  | 0.0728 |
|                          | Green leaf area                     | 588.6129   | 1.9122   | 0.1573  | 0.0639 |
|                          | Leaf thickness                      | 0.0012     | 0.5301   | 0.5915  | 0.0186 |
|                          | Single-leaf wet weight              | 0.0574     | 1.0589   | 0.3537  | 0.0364 |
|                          | Single-leaf dry weight              | 0.0002     | 0.6925   | 0.5045  | 0.0241 |
|                          | Leaf water content                  | 0.2401     | 1.1564   | 0.3220  | 0.0397 |
| Acid deposition acid-ity | Specific leaf area                  | 6359.4347  | 0.8794   | 0.4207  | 0.0305 |
|                          | Leaf chlorophyll content            | 12.8981    | 18.2309  | <0.0001 | 0.3943 |
| Acid deposition type     | Leaf nitrogen content               | 0.0809     | 7.2569   | 0.0016  | 0.2058 |
|                          | Plant aboveground wet weight        | 12.9037    | 1.0268   | 0.3648  | 0.0354 |
|                          | Plant aboveground dry weight        | 0.0339     | 0.5016   | 0.6083  | 0.0176 |
|                          | Plant aboveground water content     | 0.1461     | 0.4432   | 0.6442  | 0.0156 |
|                          | Plant malondialdehyde content       | 0.0000     | 0.4643   | 0.6310  | 0.0163 |
|                          | Plant proline content               | 39994.4062 | 102.6870 | <0.0001 | 0.7857 |
|                          | Plant soluble sugar content         | 0.6065     | 2.7070   | 0.0755  | 0.0882 |
|                          | Plant catalase activity             | 4.1720     | 0.7114   | 0.4953  | 0.0248 |
|                          | Plant peroxidase activity           | 275.4643   | 23.6645  | <0.0001 | 0.4580 |
|                          | Plant superoxide dismutase activity | 3913.1986  | 2.9269   | 0.0618  | 0.0946 |
|                          | Plant height                        | 1.4926     | 0.3017   | 0.5850  | 0.0054 |
|                          | Ground diameter                     | 0.2707     | 0.4444   | 0.5077  | 0.0079 |
|                          | Leaf length                         | 0.0035     | 0.0032   | 0.9554  | 0.0001 |
| Planting pattern         | Leaf width                          | 0.2094     | 0.2136   | 0.6458  | 0.0038 |
| Plant species            | Green leaf area                     | 24.3241    | 0.0790   | 0.7797  | 0.0014 |
| Acid deposition acid-ity | Leaf thickness                      | 0.0066     | 2.8502   | 0.0969  | 0.0484 |
|                          | Single-leaf wet weight              | 0.0221     | 0.4071   | 0.5260  | 0.0072 |
|                          | Single-leaf dry weight              | 0.0001     | 0.3465   | 0.5585  | 0.0061 |
|                          | Leaf water content                  | 0.0896     | 0.4315   | 0.5139  | 0.0076 |
|                          | Specific leaf area                  | 2969.0031  | 0.4106   | 0.5243  | 0.0073 |

|                          |                                     |           |         |         |        |
|--------------------------|-------------------------------------|-----------|---------|---------|--------|
|                          | Leaf chlorophyll content            | 30.1037   | 42.5503 | <0.0001 | 0.4318 |
|                          | Leaf nitrogen content               | 0.1645    | 14.7493 | 0.0003  | 0.2085 |
|                          | Plant aboveground wet weight        | 2.0672    | 0.1645  | 0.6866  | 0.0029 |
|                          | Plant aboveground dry weight        | 0.0043    | 0.0641  | 0.8011  | 0.0011 |
|                          | Plant aboveground water content     | 0.0252    | 0.0764  | 0.7833  | 0.0014 |
|                          | Plant malondialdehyde content       | 0.0000    | 0.1565  | 0.6939  | 0.0028 |
|                          | Plant proline content               | 106.0296  | 0.2722  | 0.6039  | 0.0048 |
|                          | Plant soluble sugar content         | 0.1669    | 0.7448  | 0.3918  | 0.0131 |
|                          | Plant catalase activity             | 0.1590    | 0.0271  | 0.8698  | 0.0005 |
|                          | Plant peroxidase activity           | 23.4422   | 2.0139  | 0.1614  | 0.0347 |
|                          | Plant superoxide dismutase activity | 482.1801  | 0.3606  | 0.5506  | 0.0064 |
|                          | Plant height                        | 0.8496    | 0.1717  | 0.8427  | 0.0061 |
|                          | Ground diameter                     | 0.2747    | 0.4510  | 0.6393  | 0.0159 |
|                          | Leaf length                         | 0.6871    | 0.6256  | 0.5386  | 0.0219 |
|                          | Leaf width                          | 0.5268    | 0.5372  | 0.5873  | 0.0188 |
|                          | Green leaf area                     | 22.6665   | 0.0736  | 0.9291  | 0.0026 |
|                          | Leaf thickness                      | 0.0005    | 0.2295  | 0.7957  | 0.0081 |
|                          | Single-leaf wet weight              | 0.0375    | 0.6927  | 0.5045  | 0.0241 |
|                          | Single-leaf dry weight              | 0.0003    | 0.9621  | 0.3883  | 0.0332 |
|                          | Leaf water content                  | 0.0118    | 0.0570  | 0.9446  | 0.0020 |
| Planting pattern         | Specific leaf area                  | 3290.3214 | 0.4550  | 0.6368  | 0.0160 |
| Plant species            | Leaf chlorophyll content            | 18.1549   | 25.6611 | <0.0001 | 0.4782 |
| Acid deposition type     | Leaf nitrogen content               | 0.1279    | 11.4698 | 0.0001  | 0.2906 |
|                          | Plant aboveground wet weight        | 6.1513    | 0.4895  | 0.6155  | 0.0172 |
|                          | Plant aboveground dry weight        | 0.0280    | 0.4149  | 0.6624  | 0.0146 |
|                          | Plant aboveground water content     | 0.0895    | 0.2717  | 0.7631  | 0.0096 |
|                          | Plant malondialdehyde content       | 0.0000    | 2.4460  | 0.0958  | 0.0803 |
|                          | Plant proline content               | 51.2973   | 0.1317  | 0.8769  | 0.0047 |
|                          | Plant soluble sugar content         | 0.0016    | 0.0069  | 0.9931  | 0.0002 |
|                          | Plant catalase activity             | 20.9372   | 3.5702  | 0.0347  | 0.1131 |
|                          | Plant peroxidase activity           | 4.9651    | 0.4265  | 0.6549  | 0.0150 |
|                          | Plant superoxide dismutase activity | 2006.3249 | 1.5006  | 0.2318  | 0.0509 |
|                          | Plant height                        | 10.2402   | 2.0696  | 0.1358  | 0.0688 |
|                          | Ground diameter                     | 0.5934    | 0.9741  | 0.3838  | 0.0336 |
|                          | Leaf length                         | 0.0900    | 0.0820  | 0.9214  | 0.0029 |
|                          | Leaf width                          | 0.6357    | 0.6482  | 0.5268  | 0.0226 |
|                          | Green leaf area                     | 157.1063  | 0.5104  | 0.6030  | 0.0179 |
|                          | Leaf thickness                      | 0.0002    | 0.1017  | 0.9035  | 0.0036 |
|                          | Single-leaf wet weight              | 0.0086    | 0.1589  | 0.8535  | 0.0056 |
|                          | Single-leaf dry weight              | 0.0002    | 0.4936  | 0.6131  | 0.0173 |
|                          | Leaf water content                  | 0.1904    | 0.9167  | 0.4058  | 0.0317 |
| Planting pattern         | Specific leaf area                  | 3832.8777 | 0.5300  | 0.5915  | 0.0186 |
| Acid deposition acid-ity | Leaf chlorophyll content            | 17.3715   | 24.5538 | <0.0001 | 0.4672 |
| Acid deposition type     | Leaf nitrogen content               | 0.0997    | 8.9395  | 0.0004  | 0.2420 |
|                          | Plant aboveground wet weight        | 6.0976    | 0.4852  | 0.6181  | 0.0170 |
|                          | Plant aboveground dry weight        | 0.0537    | 0.7954  | 0.4565  | 0.0276 |
|                          | Plant aboveground water content     | 0.6751    | 2.0487  | 0.1385  | 0.0682 |
|                          | Plant malondialdehyde content       | 0.0000    | 0.7317  | 0.4856  | 0.0255 |
|                          | Plant proline content               | 371.0091  | 0.9526  | 0.3919  | 0.0329 |
|                          | Plant soluble sugar content         | 0.4259    | 1.9011  | 0.1589  | 0.0636 |
|                          | Plant catalase activity             | 3.2152    | 0.5483  | 0.5810  | 0.0192 |
|                          | Plant peroxidase activity           | 11.7638   | 1.0106  | 0.3705  | 0.0348 |
|                          | Plant superoxide dismutase activity | 577.7917  | 0.4322  | 0.6513  | 0.0152 |
|                          | Plant height                        | 9.2270    | 1.8648  | 0.1644  | 0.0624 |
| Plant species            | Ground diameter                     | 0.6209    | 1.0193  | 0.3674  | 0.0351 |
| Acid deposition acid-ity | Leaf length                         | 0.2743    | 0.2497  | 0.7799  | 0.0088 |
|                          | Leaf width                          | 0.3778    | 0.3853  | 0.6820  | 0.0136 |
| Acid deposition type     | Green leaf area                     | 129.6897  | 0.4213  | 0.6582  | 0.0148 |
|                          | Leaf thickness                      | 0.0035    | 1.5002  | 0.2319  | 0.0509 |
|                          | Single-leaf wet weight              | 0.0235    | 0.4346  | 0.6497  | 0.0153 |

|                              |                                     |            |         |                   |        |
|------------------------------|-------------------------------------|------------|---------|-------------------|--------|
|                              | Single-leaf dry weight              | 0.0002     | 0.4377  | 0.6477            | 0.0154 |
|                              | Leaf water content                  | 0.1153     | 0.5551  | 0.5771            | 0.0194 |
|                              | Specific leaf area                  | 11950.2858 | 1.6525  | 0.2008            | 0.0557 |
|                              | Leaf chlorophyll content            | 16.2788    | 23.0095 | <b>&lt;0.0001</b> | 0.4511 |
|                              | Leaf nitrogen content               | 0.0758     | 6.7977  | <b>0.0023</b>     | 0.1954 |
|                              | Plant aboveground wet weight        | 3.5635     | 0.2836  | 0.7542            | 0.0100 |
|                              | Plant aboveground dry weight        | 0.0233     | 0.3448  | 0.7099            | 0.0122 |
|                              | Plant aboveground water content     | 0.1195     | 0.3626  | 0.6975            | 0.0128 |
|                              | Plant malondialdehyde content       | 0.0000     | 1.7875  | 0.1768            | 0.0600 |
|                              | Plant proline content               | 983.3424   | 2.5248  | 0.0892            | 0.0827 |
|                              | Plant soluble sugar content         | 0.1492     | 0.6659  | 0.5178            | 0.0232 |
|                              | Plant catalase activity             | 9.5032     | 1.6205  | 0.2069            | 0.0547 |
|                              | Plant peroxidase activity           | 92.3572    | 7.9342  | <b>0.0009</b>     | 0.2208 |
|                              | Plant superoxide dismutase activity | 2393.3482  | 1.7901  | 0.1764            | 0.0601 |
|                              | Plant height                        | 2.1440     | 0.4333  | 0.6505            | 0.0152 |
|                              | Ground diameter                     | 0.1746     | 0.2867  | 0.7519            | 0.0101 |
|                              | Leaf length                         | 0.6342     | 0.5774  | 0.5646            | 0.0202 |
|                              | Leaf width                          | 0.8737     | 0.8910  | 0.4160            | 0.0308 |
|                              | Green leaf area                     | 259.1921   | 0.8420  | 0.4362            | 0.0292 |
|                              | Leaf thickness                      | 0.0004     | 0.1847  | 0.8318            | 0.0066 |
|                              | Single-leaf wet weight              | 0.0082     | 0.1505  | 0.8606            | 0.0053 |
|                              | Single-leaf dry weight              | 0.0001     | 0.3202  | 0.7274            | 0.0113 |
| Planting pattern             | Leaf water content                  | 0.3491     | 1.6810  | 0.1955            | 0.0566 |
| Plant species                | Specific leaf area                  | 5413.7473  | 0.7486  | 0.4777            | 0.0260 |
| Acid deposition acid-<br>ity | Leaf chlorophyll content            | 13.0476    | 18.4422 | <b>&lt;0.0001</b> | 0.3971 |
|                              | Leaf nitrogen content               | 0.0569     | 5.1027  | <b>0.0092</b>     | 0.1541 |
| Acid deposition type         | Plant aboveground wet weight        | 3.1068     | 0.2472  | 0.7818            | 0.0088 |
|                              | Plant aboveground dry weight        | 0.0384     | 0.5694  | 0.5691            | 0.0199 |
|                              | Plant aboveground water content     | 0.3665     | 1.1122  | 0.3360            | 0.0382 |
|                              | Plant malondialdehyde content       | 0.0000     | 0.5634  | 0.5725            | 0.0197 |
|                              | Plant proline content               | 189.5349   | 0.4866  | 0.6173            | 0.0171 |
|                              | Plant soluble sugar content         | 0.6467     | 2.8866  | 0.0641            | 0.0935 |
|                              | Plant catalase activity             | 51.9710    | 8.8621  | <b>0.0005</b>     | 0.2404 |
|                              | Plant peroxidase activity           | 3.5540     | 0.3053  | 0.7381            | 0.0108 |
|                              | Plant superoxide dismutase activity | 5085.5952  | 3.8038  | <b>0.0283</b>     | 0.1196 |
